# Supplementary material
Source: Springer Nature journal article supplement (https://www.springermedizin.de/resource/supplementary/12960_2003_12_MOESM1_ESM.pdf/9569728)

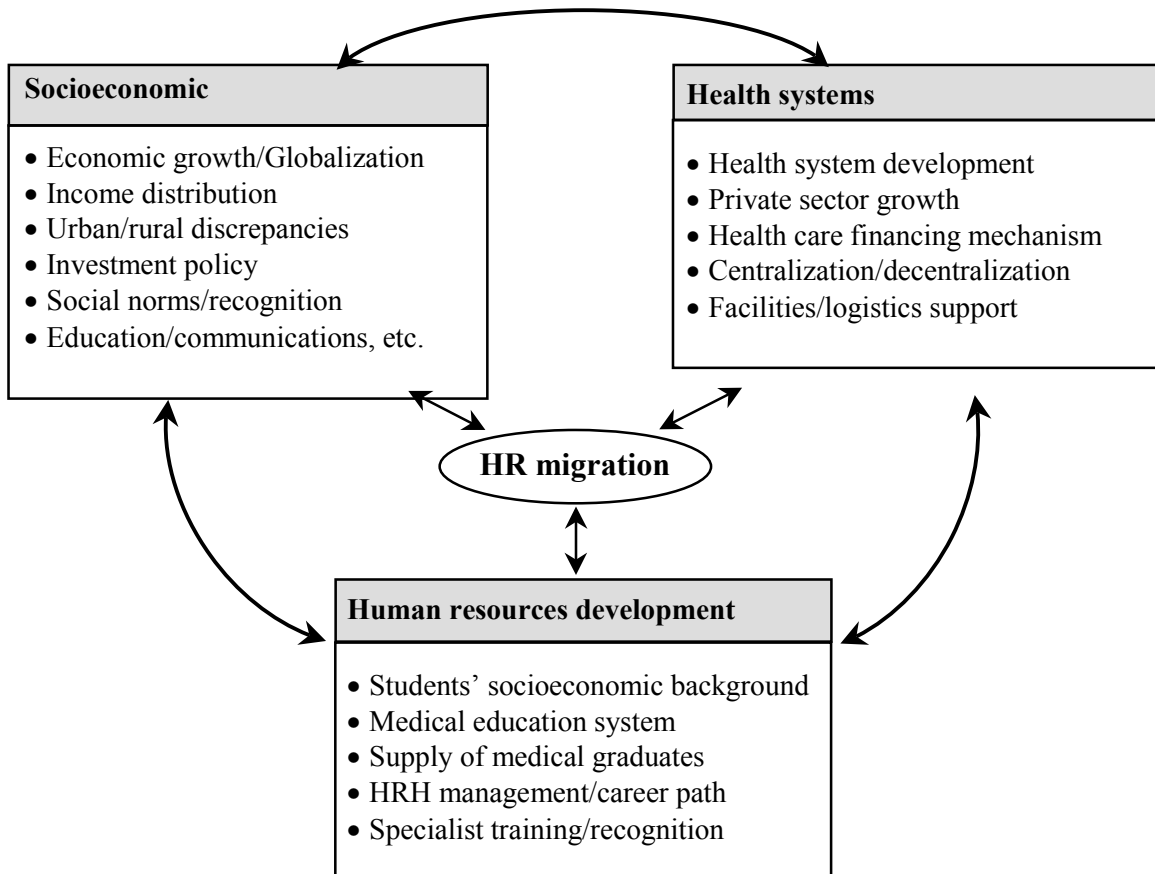

**Source:** Adapted from Wibulpolprasert S., 1997 [2]

Supplement: MOESM1 [file 9569728]
